## **The Endocrine and Metabolic Response in Male Survivors of Major Trauma**

Mark A. Foster PhD<sup>1,2</sup>, Angela E. Taylor PhD<sup>3,4</sup>, Neil E. Hill PhD<sup>5</sup>, Conor Bentley MSc<sup>1,2</sup>, Jon Bishop PhD<sup>1,2</sup>, Julian F. Bion MD<sup>6</sup>, Joanne L. Fallowfield PhD<sup>7</sup>, David R. Woods MD<sup>2,8</sup>, Irina Bancos MD<sup>9</sup>, Mark M Midwinter MD<sup>10</sup>, Janet M Lord PhD<sup>1,11,12\*</sup>, Wiebke Arlt DSc<sup>3,4,12\*</sup>

<sup>1</sup>NIHR-Surgical Reconstruction and Microbiology Research Centre, Queen Elizabeth Hospital, University Hospitals Birmingham NHS Foundation Trust, B15 2WB, UK; <sup>2</sup>Royal Centre for Defence Medicine, Queen Elizabeth Hospital Birmingham, B15 2TH, UK; <sup>3</sup>Institute of Metabolism and Systems Research, University of Birmingham, B15 2TT, UK; <sup>4</sup>Centre for Endocrinology, Diabetes and Metabolism, Birmingham Health Partners, University of Birmingham, B15 2TH, UK <sup>5</sup>Section of Investigative Medicine, Imperial College London, W12 0NN; <sup>6</sup>Intensive Care Medicine, Queen Elizabeth Hospital, University Hospitals Birmingham NHS Foundation Trust, UK; <sup>7</sup>Institute of Naval Medicine, Alverstone, Hants., UK; <sup>8</sup>Leeds Beckett University, Leeds, UK; <sup>9</sup>Division of Endocrinology, Metabolism and Nutrition, Department of Internal Medicine, Mayo Clinic, Rochester, Minnesota, USA; <sup>10</sup>School of Biomedical Sciences, University of Queensland, Brisbane, Australia; <sup>11</sup>MRC-ARUK Centre for Musculoskeletal Ageing Research, Institute of Inflammation and Ageing, University of Birmingham, Birmingham, B15 2TT, UK; <sup>12</sup>NIHR Birmingham Biomedical Research Centre, University Hospitals Birmingham NHS Foundation Trust and University of Birmingham, Birmingham, B15 2TT, UK

\* equal senior authors

### **Corresponding author:**

Lt Col Mark Anthony Foster, Academic Department of Military Surgery and Trauma, Royal Centre for Defence Medicine, ICT Centre, Birmingham, B15 2SQ

[m.foster@bham.ac.uk](mailto:m.foster@bham.ac.uk)

**Short title:** The endocrine response to major trauma

**Keywords:** major trauma; stress response; SIRS, catabolism; metabolism; critical illness; steroids; cortisol; DHEA; testosterone

**Abstract (250 words)**

**Background:** Survival rates after severe injury are improving, but complication rates and outcomes are variable. This study addressed the lack of data on the endocrine response, particularly adrenal steroid secretion, during recovery from major trauma, exploring potential targets for intervention.

**Methods:** We undertook a prospective, observational cohort study from time of injury to six months post-injury at a major UK trauma centre and a military rehabilitation unit, studying patients within 24 hours of major trauma (estimated New Injury Severity Score (NISS) >15) and at regular intervals for six months. We recorded clinical outcomes (ventilator days, length of hospital stay, organ dysfunction, sepsis), measured serum steroids by tandem mass spectrometry, and assessed muscle loss by ultrasound and nitrogen excretion.

**Findings:** We screened 996 multiply injured adults, approached 106, and recruited 95 eligible patients; 87 survived. We analysed all male survivors <50 years not treated with steroids (N=60; median age 27 [interquartile range 24-31] years; median NISS 34 [29-44]). Urinary nitrogen excretion and muscle loss peaked after one and six weeks, respectively. Glucocorticoid secretion remained within the reference range, though the serum cortisol over cortisone ratio increased, normalising by eight weeks. Serum testosterone, DHEA and DHEAS decreased immediately after injury and took two, four and more than six months, respectively, to recover; all three correlated with SOFA score and probability of sepsis.

**Interpretation:** The acute catabolic response to severe injury is accompanied by sustained androgen suppression. The impact of androgen supplementation on health outcomes after major trauma should be systematically explored.

## Introduction

Over 5 million people worldwide die each year from serious injury<sup>1</sup>, with almost 25% caused by road traffic collisions (RTC)<sup>2</sup>. In England alone, there are 5400 trauma deaths and 20,000 severe injuries treated by the National Health Service annually<sup>3</sup>. Since 2012, the establishment of 22 Trauma Centres in England has been accompanied by a 19% improvement in survival odds following injury<sup>4</sup>. During this time, the UK also received severely injured military trauma patients from the conflict in Afghanistan<sup>5,6</sup>.

Improvements in short-term outcomes have been achieved through early resuscitation and acute care<sup>7</sup>, often informed by approaches pioneered on the battlefield. However, the impact of improvements on long-term outcomes are often offset during the weeks following acute major trauma, mainly by a dysregulated Systemic Inflammatory Response Syndrome (SIRS), associated with compromised immunity increasing the risk of infection, multi-organ dysfunction/failure (MOD/MOF) and late deaths<sup>8,9</sup>. Simultaneously, the hypothalamic-pituitary-adrenal axis (HPA) is thought to drive a hypermetabolic and overtly catabolic response. Pro-inflammatory cytokines activate the enzyme 11 $\beta$ -hydroxysteroid dehydrogenase type (11 $\beta$ -HSD1) that is responsible for tissue-specific activation of glucocorticoids through conversion of inactive cortisone to active cortisol<sup>10</sup>, providing a link between SIRS and catabolism. Importantly, in this profound catabolic state, patients lose valuable lean muscle and suffer from increased rates of infection and poor wound healing. Nutritional strategies have proven disappointing<sup>11,12</sup>. Moreover, the dynamic nature of this response, in particular beyond the first few days after injury and during recovery remains poorly described and understood, limiting the evidence base for novel therapeutic interventions.

To address this issue, we have undertaken a detailed prospective study of the endocrine and metabolic response to severe injury in military and civilian populations, recruiting patients within 24 hours of major trauma and following up on them for the six subsequent months. This was undertaken to identify predictive biomarkers and therapeutic targets as well as to explore the optimal timing for therapeutic interventions targeting the endocrine response that could promote better recovery after severe traumatic injury.

## Methods

### Study Design and Protocol

This prospective cohort study was conducted in the Royal Centre for Defence Medicine and the Critical Care Unit at the Queen Elizabeth Hospital Birmingham UK (QEHB), one of 22 UK Major Adult Trauma Centres (MTC) and the primary receiving facility for UK military personnel injured abroad. Military and civilian major trauma patients with an estimated New Injury Severity Score (NISS) greater than 15<sup>13</sup> were recruited on arrival at QEHB. NISS was used to ensure those with significant extremity trauma but lower ISS were included<sup>14</sup>. Patients were not eligible if they had a significant head injury or if any pre-injury neoplastic conditions were identified.

Informed consent was obtained from a personal consultee and confirmed subsequently by surviving patients following recovery of capacity. The protocol was approved by the NRES Committee South West – Frenchay 11/SW/0177 and MOD REC 116/Gen/10.

A daily patient review allowed the injured to be clinically phenotyped. Bespoke study management software (Clinical RESearch Tool – CREST) tracked the patient through the study and their clinical data was entered prospectively. Acute Physiology and Chronic Health Evaluation II (APACHE II), Sequential Organ Failure Assessment (SOFA), and Simplified Acute Physiology Score (SAPS) II were calculated from the ICU charts<sup>15,16</sup>. Sepsis was defined using Bone's criteria of an infection associated with SIRS<sup>17</sup>, current at the time of the study.

Blood and urine samples were collected within 24 hours of acute injury and at 3, 5, 10, 14, 21, 28 days and 2, 3, 4 and 6 months after injury. This challenging sampling schedule was supported by junior clinical staff to ensure blood sampling was conducted simultaneously between 0730 and 0900hrs on the day of sampling on multiple patients; their serum was then separated and frozen at -80°C for batched analysis.

We separately collected morning blood samples from 37 healthy control subjects, who were matched by age and sex to the major trauma patients included in the final analysis group, to provide a comparator cohort for steroid analysis.

### Assessment of protein catabolism

Muscle thickness was measured by portable ultrasound to assess lean body mass as described by Campbell *et al*<sup>18,19</sup>. Ultrasound measurements were taken from 4 different muscle sites; biceps brachii, radial forearm,

rectus femoris and rectus abdominis at weekly intervals while in hospital and at 3, 4, 5 and 6 months following discharge.

Urinary urea excretion was measured by the routine laboratory at QEHB and used to estimate Total Urinary Nitrogen (TUN) excretion as described by Milner et al<sup>20</sup> [Estimated Nitrogen Excretion: Urinary Urea Excretion (mmol/l) x 0.028 x 1.25 = Total Urinary Nitrogen excretion (g/l)].

### **Serum steroid analysis**

Serum concentrations of adrenal and gonadal steroids were measured using liquid chromatography-tandem mass spectrometry (LC-MS/MS) analysis<sup>21</sup>. In brief, serum steroids were extracted via liquid/liquid extraction with tert-butyl-methyl-ether (MTBE), evaporated, reconstituted and analysed by LC-MS/MS for the quantification of cortisol and cortisone. Serum androgens and androgen precursors (DHEA, androstenedione, testosterone) were measured following oxime derivatisation<sup>22,23</sup>. DHEA sulphate (DHEAS) was measured following protein precipitation<sup>24,25</sup>.

Serum concentrations of sex hormone binding globulin (SHBG) and luteinizing hormone (LH) were analysed on the Roche Modular System (Roche Diagnostics, Lewes, UK) by two-site sandwich immunoassay using electrochemiluminescence technology.

### **Statistical Analysis**

The raw data were evaluated by analysis of variance (ANOVA); in addition, paired and unpaired Student's t-test, Chi-Square Analysis and Mann-Whitney tests were used where appropriate. Data modelling techniques were employed to allow further interrogation of the data. Generalised linear mixed-effects models<sup>26</sup> were used to examine the change in variables over time. Patients were included in the models as random effects to account for repeat measures over time on the same individuals. Time was modelled using restricted cubic splines<sup>27</sup> to allow for flexible relationships<sup>28</sup>. Severity scores were modelled as Poisson distributions due to their skewness and non-negative ranges. Plots of predicted average fixed effects with 95% confidence intervals were produced for the first 4 weeks and first 6 months after injury as required. Analyses were conducted in R using libraries lme4, effects, rms and ggplot2.

## RESULTS

### Patient recruitment and final cohort

996 multiply injured adults were assessed for eligibility soon after injury. The majority of the 889 excluded patients had a NISS $\leq$ 15; others had a significant head injury as their major injury component, and two were excluded due to a pre-injury diagnosis of cancer. Of the 106 severely injured patients approached, 102 patients were recruited into the study, with two withdrawn and re-assessment in five revealing an actual NISS $\leq$ 15, leaving a final study cohort of 95 patients (**Fig. 1A**).

After exclusion of fatalities (n=8) and patients given steroids as part of their treatment (n=7), the cohort comprised 80 survivors with completed sample collection over 6 months. To minimise confounders from age-related comorbid disease and sex, we excluded women (n=9) and age-advanced men (n=11), arriving at our final study cohort of 60 men <50 years (**Fig. 1B**).

A summary of the cohort characteristics is shown in **Fig. 2**. Median age was 27 (interquartile range (IQR) 24-31) years, median NISS was 34 (IQR 29-44), and patient day 1 (=day of major trauma) APACHE II score was 21 (IQR 14-25). Patients remained ventilated and stayed on the intensive care unit (ICU) for a median of 9 (IQR 5-16) days. Median length of stay at QEHB was 36 (IQR 19-56) days. Improvised Explosive Device (IED) (n=33; 55%) and Road Traffic Collision (RTC) (n=11; 18%) were the most common causes of injury. Twenty-five (42%) patients had at least one septic episode and most occurred in the second week following injury (**Fig 2C**).

### Glucocorticoid synthesis and metabolism after major trauma

Serum concentrations of the major catabolic glucocorticoid cortisol increased after injury, peaking at 408 (IQR 249-511) nmol/L at two weeks (**Fig. 3A; Suppl. Fig. 2**). However, concentrations remained within the wide range seen in healthy controls. Serum concentrations of the inactive metabolite cortisone were lower than normal after injury, and increased slowly over time, but this trend was not significant (p=0.08) (**Fig. 3B**). The serum cortisol to cortisone ratio, a marker of glucocorticoid activation by 11 $\beta$ -HSD1 activity (**Fig. 3C**), peaked at two weeks post-injury and returned to normal at around eight weeks.

### **Androgen synthesis and activation after major trauma**

The adrenal-derived steroid dehydroepiandrosterone (DHEA) serves as an androgen precursor through downstream conversion to androstenedione and subsequent activation to the active androgen testosterone. Serum concentrations of DHEA were very low after injury ( $p < 0.0001$ ), as compared to controls, but recovered by 3 months post-injury (**Fig. 3D, Suppl. Fig. 2**). In contrast, its sulphate ester, DHEAS, failed to recover to values within the healthy reference range even at the end of the 6-month study period (**Fig. 3E**). Consequently, the serum DHEA to DHEAS ratio (**Fig. 3F**) increased by week 2 compared to controls and failed to return to normal during the entire study period. The serum cortisol to DHEAS ratio (**Fig. 3G**) increased after injury, peaking at 2 weeks, before slowly declining over the study period, but without returning to normal by 6 months.

Serum concentrations of the androgen precursor androstenedione (**Fig. 3H**) were below the reference range immediately after injury, recovering to the mid reference range at 2 weeks after injury, therefore, recovering much faster than serum DHEA, suggestive of rapid downstream activation of DHEA to androstenedione.

Serum concentrations of the active, androgen receptor-activating androgen testosterone (**Fig. 3I**) were low following injury, but started to increase after two weeks, recovering to the healthy sex- and age-matched reference range approximately eight weeks after injury.

Serum luteinising hormone (LH), the pituitary gonadotrophin responsible for gonadal stimulation of testosterone synthesis, was acutely suppressed immediately after injury, and recovered to the normal range approximately 2 weeks after injury (**Suppl. Fig. 2A**). Serum sex hormone-binding globulin (SHBG) (**Suppl. Fig. 2B**) concentrations were subnormal immediately post-injury but returned to the healthy reference range between injury and day 7.

### **Protein catabolism after major trauma**

The 24-hour total urinary nitrogen (TUN) excretion increased immediately after trauma, to reach a peak at  $25.0 \pm 16.1$  g/day at the end of the first week, returning to below 15.0 g/day by week 4. The measured mean maximum rate of nitrogen excretion was  $33.0 \pm 21.3$  g/day (**Fig. 4A**). The normalisation of TUN excretion coincided with the gradual recovery of adrenal and gonadal androgen production (**Figs. 4B+C**).

The biceps brachii muscle was the most reliable site for ultrasound measured muscle thickness; dressings, amputations and other wounds hampered the measurements in other areas. Changes in biceps brachii muscle thickness followed a U-shaped curve after injury that reached a nadir at week 6 (day 1 after trauma compared with week 6,  $p=0.001$ ). The mean maximum loss was 22.7% ( $\pm 12.5$ ) (**Fig. 4D**). Similar to TUN, the recovery of muscle thickness took place alongside gradually increasing adrenal and gonadal androgen production (**Figs. 4E+F**).

### **Clinical course of post-traumatic recovery and serum androgen dynamics**

The relationship between adrenal and gonadal androgens and the Sequential Organ Failure Score (SOFA) and probability of sepsis are illustrated in **Fig. 5**. During the first four weeks after trauma, serum concentrations of DHEA, DHEAS, and testosterone all correlated with the clinical SOFA score (autocorrelation factor (ACF) = 0.85, 0.90 and -0.79, respectively). The serum concentrations of all three steroids also showed strong associations with the probability of sepsis ( $R=0.85$ , 0.85 and -0.97 for serum DHEA, DHEAS and testosterone, respectively). SOFA score and probability of sepsis also correlated strongly with the DHEA:DHEAS ratio (autocorrelation factor (ACF) = -0.94 and -0.96 respectively) and with the Cortisol:DHEAS ratio, negatively for the SOFA score but positively for probability of sepsis (autocorrelation factor (ACF) = -0.81 and 0.89 respectively) (**Suppl. Fig 3**).



## Discussion

In our study, we have characterised the response of adrenal and gonadal steroids and catabolic metabolism to severe injury, describing the related dynamic changes from the day of acute major trauma through to six months post-injury in a prospectively recruited cohort. Modelling the resulting data has allowed us to provide a detailed description of the post-injury transition from catabolism to anabolism, a point following injury where anabolism becomes the dominant process as the severely injured individual recovers. This analysis revealed an initial phase of glucocorticoid activation and immediate, sustained suppression of adrenal and gonadal androgen synthesis, which took two to more than six months to recover and revealed associations between specific endocrine parameters and patient outcomes including risk of sepsis. These novel data, comprising in-depth phenotyping and kinetics of the endocrine response to severe trauma, provide a rationale for targeting androgen balance with interventions aimed at improving health outcomes for critically injured patients.

Our data are the first to provide detailed adrenal and gonadal steroid data beyond the first days after trauma in a large cohort of patients, with all patients recruited prospectively and steroid analysis carried out by tandem mass spectrometry. As summarised in a recent meta-analysis, previous data on serum cortisol after injury is usually limited to small cohorts derived from patients undergoing elective surgery, rarely followed up for more than two days<sup>29</sup>. In our study, serum cortisol quickly returned to normal following initial increases after acute trauma. In contrast, serum cortisone remained low for three months post-injury, resulting in a significant increase in the cortisol to cortisone ratio, an *in vivo* measure of the activity of the enzyme 11 $\beta$ -hydroxysteroid dehydrogenase type 1 (11 $\beta$ -HSD1). 11 $\beta$ -HSD1 is the major enzyme converting inactive cortisone to cortisol and has been shown to be upregulated systemically and locally in response to inflammation in sepsis and trauma, possibly in an attempt to dampen the inflammatory response<sup>30,31</sup>. As our data reveal, the downside of this increased activity is increased local catabolic potential, affecting tissues such as skeletal muscle which express 11 $\beta$ -HSD1<sup>32</sup>. Previous research has shown increased 11 $\beta$ -HSD1 activity in an animal model of trauma haemorrhage<sup>33</sup> and a recent study has shown improved wound healing in mice treated with 11 $\beta$ -HSD1 inhibitors<sup>34</sup>; however, human data after trauma were previously lacking. Employing 11 $\beta$ -HSD1 inhibitors in the recovery phase after injury may help to prevent muscle loss by

reducing the preponderance of cortisol and may also stimulate adrenal androgen synthesis, due to activation of the hypothalamic-pituitary-adrenal feedback response to reduced tissue-specific glucocorticoid activation. Our finding of an increase in active cortisol over inactive cortisone in circulation during the early post-injury phase could also reflect a decreased metabolism of cortisol by  $11\beta$ -HSD2, converting active cortisol to cortisone, or by the enzyme  $5\alpha$ -reductase, responsible for downstream metabolism of both cortisol and cortisone. A study investigating the *in vivo* metabolism of deuterated cortisol and cortisone in 11 patients with critical illness concluded that increased glucocorticoid activation in the context of ICU treatment might be due to decreased cortisol clearance rather than increased glucocorticoid activation<sup>35</sup>.

In this study, we observed a pronounced and sustained loss of adrenal and gonadal androgen synthesis immediately following acute major trauma. The recovery of circulating DHEA and testosterone concentrations to the mid-reference range took two and four months post-injury, respectively, and DHEAS remained pathologically decreased at the end of the six-month follow-up period. Previous reports have described a suppression of the enzyme SULT2A1, the major DHEA sulphotransferase, and its sulphate donor enzyme, PAPSS2, in a mouse model of acute inflammation<sup>36</sup>. We reviewed 23 previous studies that measured serum DHEA and DHEAS in critically ill patients (**Suppl. Table 1**), but most of them followed patients only for a few days and relatively few patients suffered from acute trauma. One previous study<sup>37</sup> described decreased circulating concentrations of DHEAS in 181 patients with septic shock and 31 patients with acute hip fracture; serum DHEA was increased in the sepsis patients but decreased in the trauma patients. However, as the hip fracture patients in that study were mostly elderly (mean age 82 years) and female, it is not clear if this finding was trauma-related or due to confounding factors.

A number of previous studies in trauma patients described an association of infection rate and mortality with low circulating DHEAS concentrations and also a raised cortisol to DHEAS ratio<sup>38-41</sup>. *In vitro* studies have demonstrated that cortisol decreases neutrophil superoxide production, which is counteracted by coincubation with DHEAS<sup>38</sup>. Furthermore, we have previously shown that DHEAS, but not DHEA, directly enhances neutrophil superoxide generation, a key mechanism of human bactericidal function, via activation of protein kinase C- $\beta$ , independent of androgen receptor signalling<sup>42</sup>. In this study, analysing a large cohort

of men younger than 50 years who suffered major trauma, we observed suppression of both serum DHEA and DHEAS post-injury, indicating that the loss of adrenal androgen synthesis represents a trauma-related event. Importantly, we show for the first time that this decrease in circulating adrenal androgen precursors is sustained for several months and that DHEAS remains low 6 months post-injury. We speculate that there may be a potential therapeutic benefit from restoring the levels of these steroids during recovery.

Alongside the decrease in adrenal androgen synthesis, we observed a near complete loss of gonadal testosterone production and pituitary LH secretion immediately after trauma. Both the gradual recovery of adrenal and gonadal androgen production paralleled the decrease in catabolism, as assessed by urinary nitrogen excretion and biceps muscle thickness. The suppression of the hypothalamus-pituitary-gonadal (HPG) axis after severe injury that is shown in our study is supported by the literature<sup>43-46</sup>. We demonstrate that suppression of the HPG is shorter than for the HPA axis with LH returned to normal ranges after 1-2 weeks and testosterone levels were returning to normal levels by 4 weeks. In traumatic brain injury studies, a significant proportion of patients go on to develop anterior pituitary dysfunction<sup>47,48</sup>, which is even more pronounced in patients exposed to a blast injury mechanism<sup>49</sup>. However, in this study, significant head injury represented an exclusion criterion for recruitment. More recently, Gang *et al* reported low testosterone immediately after injury in a study with 95 patients who had suffered severe injury<sup>50</sup>, but they did not provide follow-up data. While limited data from patients with burns and critical illness have suggested a central, hypothalamic-pituitary cause of trauma-related hypogonadism<sup>51,52</sup>, the evidence base prior to our study has been limited. The current study suggests a central cause of suppression to the gonadotrophic axis, with a decrease in both pituitary LH and gonadal testosterone secretion. However, it cannot be excluded that the administration of opiates, as typically required after major trauma, could causally contribute to the induction of central hypogonadism<sup>53</sup>.

Importantly, our study shows for the first time that young men suffering from major trauma experience a sustained loss of androgen production. Androgens are important in wound healing, erythrocytosis, bone density and muscle mass<sup>54</sup>. The catabolic state that occurs following trauma thus presents a significant challenge to these patients. The use of androgens to ameliorate catabolism has some precedent, as evidenced by the use of the synthetic androgen, oxandrolone, that has some proven benefit in treating burn injury<sup>55</sup>. A

meta-analysis of 15 RCTs including 806 burns patients by Li et al, showed significant benefits ( $P < 0.05$ ) for using oxandrolone including less net weight loss, lean body mass loss, nitrogen loss, donor-site healing time, and length of stay in the catabolic and rehabilitative phases<sup>56</sup>. The use of oxandrolone in major trauma was investigated in two studies but no benefit was demonstrated. However, one of the two trials was underpowered<sup>58</sup> and the other was stopped early due to re-intubation rates being higher in the treatment group but failed to acknowledge the increased death rate in the placebo arm<sup>57,58</sup>.

The strengths of our study include its prospective nature, relatively narrow age range of the patients, single gender, single site for recruitment and analysis and detailed follow-up over six months post injury as well as the measurement of circulating steroid hormones by state-of-the-art tandem mass spectrometry. Analysing a young cohort has also reduced the confounding effects of age-related c-morbidities. Our study is limited by the diverse nature of major trauma patients in relation to injury pattern and the involvement of military casualties. Using NISS>15 as an inclusion criterion, we attempted to use a measure of both the injury burden and include injuries to multiple extremities. The timing and number of observations during our study was pragmatic and some statistical comparisons were made using modelled data.

In conclusion, in this to date most detailed and first prospective study of the endocrine response after trauma, we were able to follow the acute response to severe injury for 6 months, revealing severe DHEAS deficiency and decreased adrenal and gonadal androgen production that is sustained for many months. Recovery of androgen production in the severely injured patients was mirrored by a switch from catabolism to anabolism. We were also able to show associations between the adrenal and gonadal androgens and risk of sepsis. Therefore, the effects of an anabolic intervention addressing the pronounced decrease in androgen we identified warrants detailed study in men with major trauma, to assess its impact on morbidity including infectious episodes and recovery of normal muscle strength and health status.

## **Implications**

This observational study identifies adrenal and gonadal androgens and androgen precursors such as DHEA as potential agents to counteract catabolism but also enhance immune function during the early recovery after major trauma. There are no studies to date to assess DHEA supplementation in a trauma population. A randomised controlled trial is now needed to prove efficacy in a population still vulnerable to prolonged morbidity and assess the potential of such treatment to reduce hospital stay and their long-term burden of care.

### **Contributors**

MF, CB, JFB, MM, JL and WA designed the study. JB and MF performed the statistical analysis. MF, CB, NH, JF, DW collected samples, ultrasound measurements and clinical data from patient and controls. AT and WA carried out steroid analysis. MF, AT, NH, CB, JB, JFB, JF, DW, MM, JL and WA undertook data analysis. IB and MF reviewed the literature. MF drafted the manuscript and AT, NH, CB, JB, JFB, JF, DW, IB, MM, JL and WA co-wrote the final report. All authors contributed to writing the final report and approved the version to be published.

### **Declaration of interests**

There is no conflict of interests for any of the authors. JML and WA are supported by the National Institute for Health Research (NIHR) through the NIHR Birmingham Biomedical Research Centre. The views expressed are those of the authors and not necessarily those of the NIHR or the Department of Health and Social Care.

### **Acknowledgements**

The SIR Study was part of the Surgeon General's Casualty Nutrition Study (SGCNS), supported by University Hospitals Birmingham NHS Foundation Trust (UHB) and the University of Birmingham. Additional funding was provided by the Drummond Trust Foundation. We thank staff from the NIHR Surgical Reconstruction and Microbiology Centre, Leah Duffy, Lauren Cooper, Peter Ip and Aisling Crombie; military nurses Michelle Taylor and Matt Daley; junior doctors from

UHB, Abigail Routledge, Ben Booth and Researchers and staff from University of Birmingham, Hema Chahal, Donna M. O'Neil, Jon Hazeldine and Pete Hampson; Institute of Naval Medicine, Dr Adrian Allsopp, Sophie Britland, Dr Pieter Brown, Roz Cobley, Simon Delves, Anneliese Shaw, Dr Fran Gunner, Jenny Hayward-Karlsson; Defence Rehabilitation Centre Headley Court, Jakob Kristensen, Wg Cdr Alex Bennett; University of Surrey, Prof Susan Lanham-New; Imperial University, Prof Stephen Brett; Dr Kevin Murphy, Prof Gary Frost; members of SGCNS not already mentioned, Surg Cdr Jane Risdall, Andy Roberts, Lt Col Sandra Williams and Col Duncan Wilson.

## References

1. World Health Organization. Injuries and violence: the facts 2014. 2014.
2. OECD I. Road Safety Annual Report. International Transport Forum; 2014.
3. Office GBNA. Major Trauma Care in England. The Stationery Office; 2010.
4. Moran CG, Lecky F, Bouamra O, Lawrence T, Edwards A, Woodford M, et al. Changing the System - Major Trauma Patients and Their Outcomes in the NHS (England) 2008-17. *EClinicalMedicine* 2018;2:13–21.
5. Ministry of Defence. Operations in Afghanistan. [Available from: <https://www.gov.uk/guidance/uk-forces-operations-in-afghanistan/casualty-figures2015> accessed 5<sup>th</sup> Jan 16].
6. Ministry of Defence. UK forces: operations in Afghanistan. [Available from :<https://www.gov.uk/guidance/uk-forces-operations-in-afghanistan/casualty-figures2014> accessed 5<sup>th</sup> Jan 16].
7. Hodgetts TJ, Mahoney PF. Military pre-hospital care: why is it different? *J R Army Med Corps* 2009;155:4–8.
8. Durham RM, Moran JJ, Mazuski JE, Shapiro MJ, Baue AE, Flint LM. Multiple organ failure in trauma patients. *J Trauma* 2003;55:608–16.
9. Lenz A, Franklin GA, Cheadle WG. Systemic inflammation after trauma. *Injury* 2007;38:1336–45.
10. Esteves CL, Verma M, Róg-Zielińska E, Kelly V, Sai S, Breton A, et al. Pro-inflammatory cytokine induction of 11 $\beta$ -hydroxysteroid dehydrogenase type 1 in A549 cells requires phosphorylation of C/EBP $\beta$  at Thr235. *PLoS ONE* 2013;8:e75874.
11. Arabi YM, Casaer MP, Chapman M, Heyland DK, Ichai C, Marik PE, et al. The intensive care medicine research agenda in nutrition and metabolism. *Intensive Care Med* 2017;43:1239–56.
12. Reignier J, Boisramé-Helms J, Brisard L, Lascarrou J-B, Ait Hssain A, Anguel N, et al. Enteral versus parenteral early nutrition in ventilated adults with shock: a randomised, controlled, multicentre, open-label, parallel-group study (NUTRIREA-2). *Lancet* 2018;391:133–43.
13. Palmer C. Major trauma and the injury severity score--where should we set the bar? *Annu Proc Assoc Adv Automot Med* 2007;51:13–29.
14. Balogh ZJ, Varga E, Tomka J, Süveges G, Tóth L, Simonka JA. The new injury severity score is a better predictor of extended hospitalization and intensive care unit admission than the injury severity score in patients with multiple orthopaedic injuries. *J Orthop Trauma* 2003;17:508–12.
15. Le Gall J-R, Lemeshow S, Saulnier F. A New Simplified Acute Physiology Score (SAPS II) Based on a European/North American Multicenter Study. *JAMA* 1993;270:2957–63.
16. Knaus WA, Draper EA, Wagner DP, Zimmerman JE. APACHE II: a severity of disease classification system. *Crit Care Med* 1985;13:818–29.
17. Bone RC, Balk RA, Cerra FB, Dellinger RP, Fein AM, Knaus WA, et al. Definitions for sepsis and organ failure and guidelines for the use of innovative therapies in sepsis. The ACCP/SCCM Consensus Conference Committee. American College of Chest Physicians/Society of Critical Care Medicine. 1992. pages 1644–55.

18. Campbell IT, Watt T, Withers D, England R, Sukumar S, Keegan MA, et al. Muscle thickness, measured with ultrasound, may be an indicator of lean tissue wasting in multiple organ failure in the presence of edema. *Am J Clin Nutr* 1995;62:533–9.
19. Reid CL, Campbell IT, Little RA. Muscle wasting and energy balance in critical illness. *Clin Nutr* 2004;23:273–80.
20. Milner EA, Cioffi WG, Mason AD, McManus WF, Pruitt BA. Accuracy of urinary urea nitrogen for predicting total urinary nitrogen in thermally injured patients. *JPEN J Parenter Enteral Nutr* 1993;17:414–6.
21. Ionita IA, Fast DM, Akhlaghi F. Development of a sensitive and selective method for the quantitative analysis of cortisol, cortisone, prednisolone and prednisone in human plasma. *J Chromatogr B Analyt Technol Biomed Life Sci* 2009;877:765–72.
22. Kushnir MM, Blamires T, Rockwood AL, Roberts WL, Yue B, Erdogan E, et al. Liquid chromatography-tandem mass spectrometry assay for androstenedione, dehydroepiandrosterone, and testosterone with pediatric and adult reference intervals. *Clinical Chemistry* 2010;56:1138–47.
23. O'Reilly MW, Taylor AE, Crabtree NJ, Hughes BA, Capper F, Crowley RK, et al. Hyperandrogenemia predicts metabolic phenotype in polycystic ovary syndrome: the utility of serum androstenedione. *J Clin Endocrinol Metab* 2014;99:1027–36.
24. Chadwick CA, Owen LJ, Keevil BG. Development of a method for the measurement of dehydroepiandrosterone sulphate by liquid chromatography-tandem mass spectrometry. *Ann Clin Biochem* 2005;42:468–74.
25. Haring R, Wallaschofski H, Teumer A, Kroemer H, Taylor AE, Shackleton CHL, et al. A SULT2A1 genetic variant identified by GWAS as associated with low serum DHEAS does not impact on the actual DHEA/DHEAS ratio. *Journal of Molecular Endocrinology* 2012;50:73–7.
26. Breslow NE, Clayton DG. Approximate Inference in Generalized Linear Mixed Models. *Journal of the American Statistical Association* 2012;88:9–25.
27. Meyer MC. Inference using shape-restricted regression splines. *Ann Appl Stat* 2008;2:1013–33.
28. Harrell FE, Lee KL, Mark DB. Multivariable prognostic models: issues in developing models, evaluating assumptions and adequacy, and measuring and reducing errors. *Stat Med* 1996;15:361–87.
29. Prete A, Yan Q, Al-Tarrah K, Akturk HK, Prokop LJ, Alahdab F, et al. The cortisol stress response induced by surgery: A systematic review and meta-analysis. *Clin Endocrinol* 2018;89:554–67.
30. Chapman KE, Coutinho A, Gray M, Gilmour JS, Savill JS, Seckl JR. Local amplification of glucocorticoids by 11beta-hydroxysteroid dehydrogenase type 1 and its role in the inflammatory response. *Ann NY Acad Sci* 2006;1088:265–73.
31. Ray JA, Meikle AW. Cortisol-Cortisone Shuttle: A Functional Indicator of 11beta-HSD Activity. In: *Cortisol Physiology, Regulation and Health Implications*. 2012. pages 91–106.
32. Hassan-Smith ZK, Morgan SA, Sherlock M, Hughes B, Taylor AE, Lavery GG, et al. Gender-Specific Differences in Skeletal Muscle 11 $\beta$ -HSD1 Expression Across Healthy Aging. *J Clin Endocrinol Metab* 2015;100:2673–81.
33. Wang P, Ba ZF, Jarrar D, Cioffi WG, Bland KI, Chaudry IH. Mechanism of adrenal insufficiency following trauma and severe hemorrhage: role of hepatic 11beta-hydroxysteroid dehydrogenase. *Arch Surg* 1999;134:394–401.



34. Tiganeşcu A, Tahrani AA, Morgan SA, Otranto M, Desmoulière A, Abrahams L, et al. 11 $\beta$ -Hydroxysteroid dehydrogenase blockade prevents age-induced skin structure and function defects. *The Journal of Clinical Investigation* 2013;123:3051–60.
35. Boonen E, Van den Berghe G. Cortisol metabolism in critical illness: implications for clinical care. *Curr Opin Endocrinol Diabetes Obes* 2014;21:185–92.
36. Kim MS, Shigenaga J, Moser A, Grunfeld C, Feingold KR. Suppression of DHEA sulfotransferase (Sult2A1) during the acute-phase response. *Am J Physiol Endocrinol Metab* 2004;287:E731–8.
37. Arlt W, Hammer F, Sanning P, Butcher SK, Lord JM, Allolio B, et al. Dissociation of serum dehydroepiandrosterone and dehydroepiandrosterone sulfate in septic shock. *Journal of Clinical Endocrinology & Metabolism* 2006;91:2548–54.
38. Butcher SK, Killampalli V, Lascelles D, Wang K, Alpar EK, Lord JM. Raised cortisol:DHEAS ratios in the elderly after injury: potential impact upon neutrophil function and immunity. *Aging Cell* 2005;4:319–24.
39. Beishuizen A, Thijs LG, Vermes I. Decreased levels of dehydroepiandrosterone sulphate in severe critical illness: a sign of exhausted adrenal reserve? *Crit Care* 2002;6:434–8.
40. Lindh A, Carlström K, Eklund J, Wilking N. Serum steroids and prolactin during and after major surgical trauma. *Acta Anaesthesiol Scand* 1992;36:119–24.
41. Parker CR Jr, Baxter CR. Divergence in adrenal steroid secretory pattern after thermal injury in adult patients. *J Trauma* 1985;
42. Radford DJ, Wang K, McNelis JC, Taylor AE, Hechenberger G, Hofmann J, et al. Dehydroepiandrosterone sulfate directly activates protein kinase C-beta to increase human neutrophil superoxide generation. *Mol Endocrinol* 2010;24:813–21.
43. Folan MM, Stone RA, Pittenger AL, Stoffel JA, Hess MM, Kroboth PD. Dehydroepiandrosterone, dehydroepiandrosterone-sulfate, and cortisol concentrations in intensive care unit patients. *Crit Care Med* 2001;29:965–70.
44. Ilias I, Stamoulis K, Armaganidis A, Lyberopoulos P, Tzanela M, Orfanos S, et al. Contribution of endocrine parameters in predicting outcome of multiple trauma patients in an intensive care unit. *Hormones (Athens)* 2007;6:218–26.
45. Brorsson C, Dahlqvist P, Nilsson L, Thunberg J, Sylvan A, Naredi S. Adrenal response after trauma is affected by time after trauma and sedative/analgesic drugs. *Injury* 2014;:1–30.
46. Bergquist M, Huss F, Fredén F, Mass GHC, 2016. Altered adrenal and gonadal steroids biosynthesis in patients with burn injury. *Clinical Mass Spectrometry* 2016;1:19–26.
47. Berg C, Oeffner A, Schumm-Draeger PM, Badorrek F, Brabant G, Gerbert B, et al. Prevalence of anterior pituitary dysfunction in patients following traumatic brain injury in a German multi-centre screening program. *Exp Clin Endocrinol Diabetes* 2010;118:139–44.
48. Wagner J, Dusick JR, McArthur DL, Cohan P, Wang C, Swerdloff R, et al. Acute Gonadotroph and Somatotroph Hormonal Suppression after Traumatic Brain Injury. *J Neurotrauma* 2010;27:1007–19.
49. baxter D, Sharp DJ, Feeney C, Papadopoulou D, Ham TE, Jilka S, et al. Pituitary dysfunction after blast traumatic brain injury: The UK BIOSAP study. *Ann Neurol* 2013;74:527–36.

50. Gang W, Limin X, Yang W, Zhanzhi W, Lijun X. The effects of craniocerebral and extracranial trauma on the changes in serum testosterone and estradiol in the early stage and their clinical significance. *Journal of Trauma and Acute Care Surgery* 2013;74:254–8.
51. Vogel AV, Peake GT, Rada RT. Pituitary-testicular axis dysfunction in burned men. *J Clin Endocrinol Metab* 1985;60:658–65.
52. Spratt DI, Bigos ST, Beitins I, Cox P, Longcope C, Orav J. Both hyper- and hypogonadotropic hypogonadism occur transiently in acute illness: bio- and immunoactive gonadotropins. *J Clin Endocrinol Metab* 1992;75:1562–70.
53. DANIELL H. DHEAS Deficiency During Consumption of Sustained-Action Prescribed Opioids: Evidence for Opioid-Induced Inhibition of Adrenal Androgen Production. *The Journal of Pain* 2006;7:901–7.
54. Demling RH. Comparison of the anabolic effects and complications of human growth hormone and the testosterone analog, oxandrolone, after severe burn injury. *Burns* 1999;25:215–21.
55. Wolf SE, Edelman LS, Kemalyan N, Donison L, Cross J, Underwood M, et al. Effects of oxandrolone on outcome measures in the severely burned: a multicenter prospective randomized double-blind trial. *J Burn Care Res* 2006;27:131–9; discussion140–1.
56. Li H, Guo Y, Yang Z, Roy M, Guo Q. The efficacy and safety of oxandrolone treatment for patients with severe burns: A systematic review and meta-analysis. *Burns* 2016;42:717–27.
57. Bulger EM, Jurkovich GJ, Farver CL, Klotz P, Maier RV. Oxandrolone does not improve outcome of ventilator dependent surgical patients. *Ann Surg* 2004;240:472–8–discussion478–80.
58. Gervasio JM, Dickerson RN, Swearingen J, Yates ME, Yuen C, Fabian TC, et al. Oxandrolone in trauma patients. *Pharmacotherapy* 2000;20:1328–34.

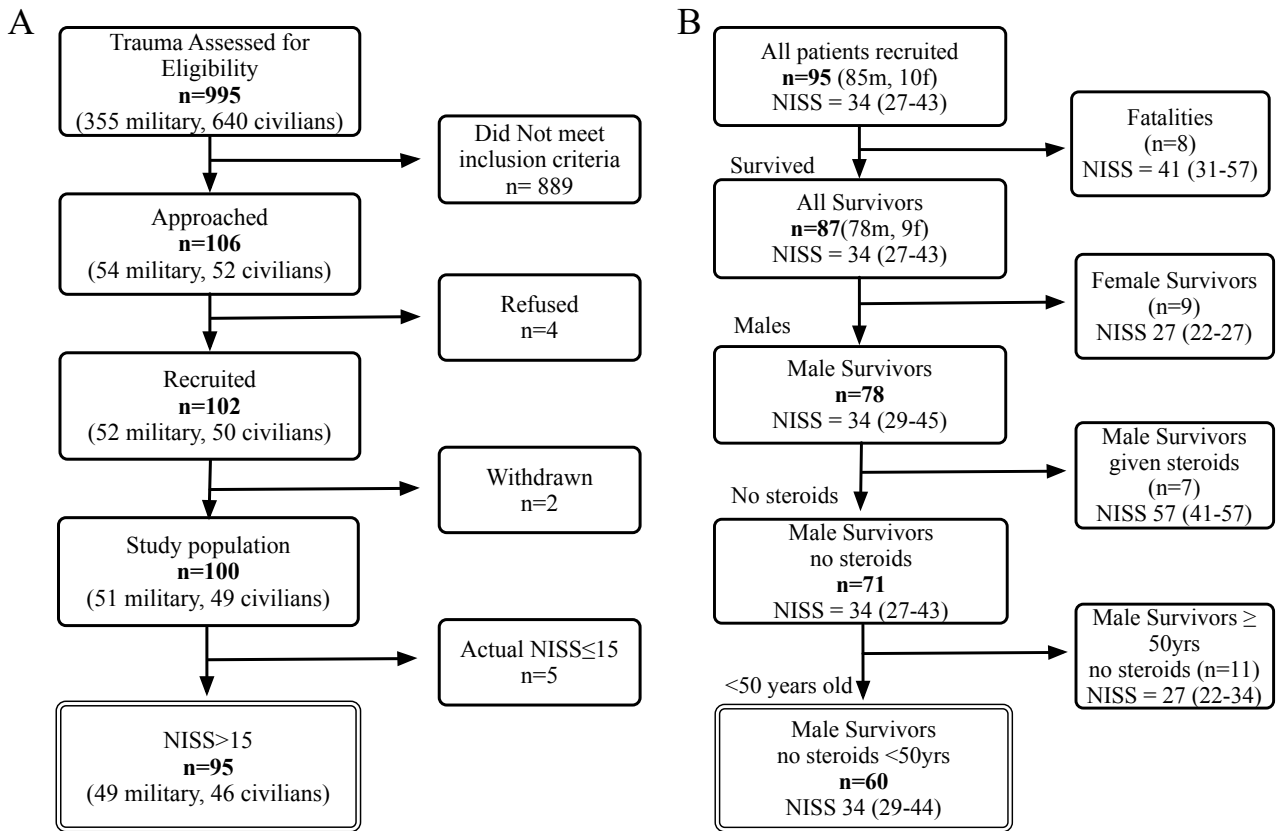

**Figure 1. Consort diagram.** (A) recruitment process and (B) subgroup selection for analysis for sixty male survivors of severe injury (NISS>15) under 50 years of age who had not been given exogenous steroids were analysed.

**A**

| <b>Demographics</b>           |              |
|-------------------------------|--------------|
| Patients n=60                 | Median (IQR) |
| Age                           | 27 (24-31)   |
| GCS                           | 14 (3-15)    |
| ISS                           | 25 (17-32)   |
| NISS                          | 34 (29-44)   |
| TRISS                         | 94 (56-98)   |
| APACHE 2 (Day1)               | 21 (14-25)   |
| SAPS 2 (Day1)                 | 48 (26-54)   |
| SOFA (Day1)                   | 9 (6-10)     |
| Septic Episodes               | 1 (0-2)      |
| RBCs (Day1), Units            | 10 (2-17)    |
| FFP (Day 1), Units            | 9 (1-15)     |
| Crystalloid/colloid (Day1), L | 0 (0-1)      |
| Ventilator Days               | 9 (5-12)     |
| ICU Length of Stay, Days      | 9 (5-16)     |
| Operative procedures          | 5 (3-7.5)    |
| Hospital Length of Stay, Days | 36 (19-56)   |

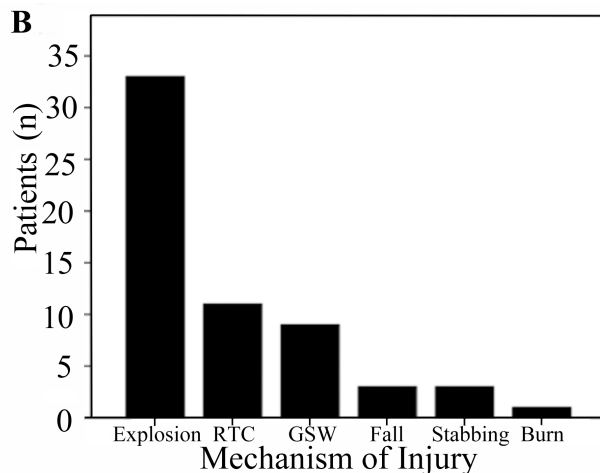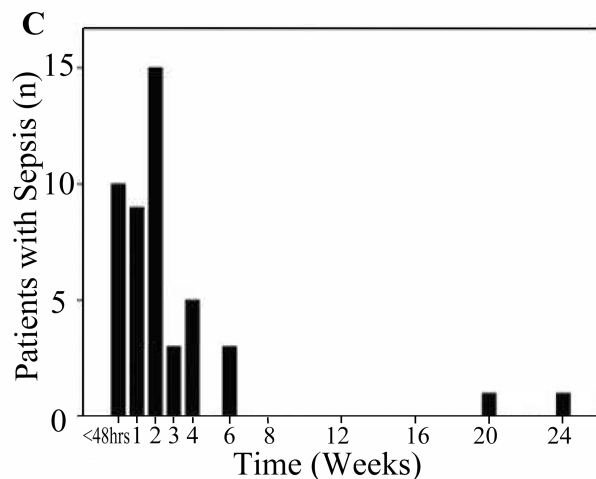

**Figure 2. Patient Characteristics of the Analysis Cohort.** (A) Demographics, (B) Mechanism of Injury and (C) the distribution of septic episodes for 60 male survivors from severe injury (NISS>15) under 50 years of age.

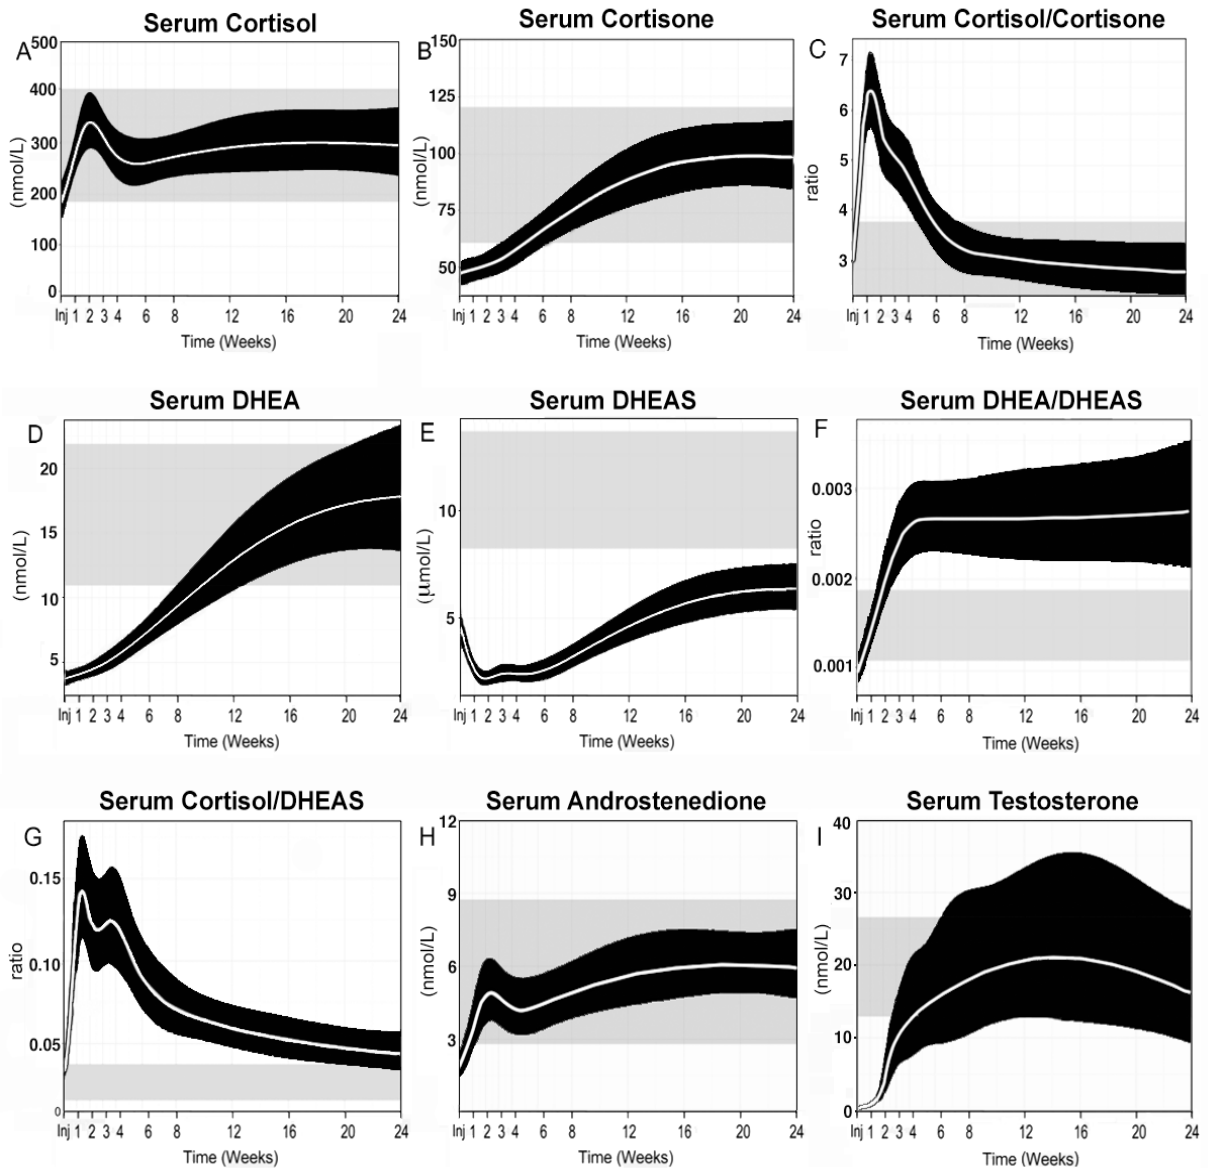

**Figure 3. Serum steroids in 60 male survivors of severe injury (NISS>15) under 50 years of age.** Serum concentrations shown include cortisol (A), cortisone (B), the cortisol/cortisone ratio (C), DHEA (D), DHEAS (E), the DHEA/ DHEAS ratio (F), the cortisol/DHEAS ratio (G), androstenedione (H), and testosterone (I). Data are represented after modelling of the raw data (Suppl. Fig. 1) using a non-linear mixed effects model that accounts for unbalanced repeated measures using a 4-knot cubic spline. Modelled data are shown as means and 95% confidence intervals.

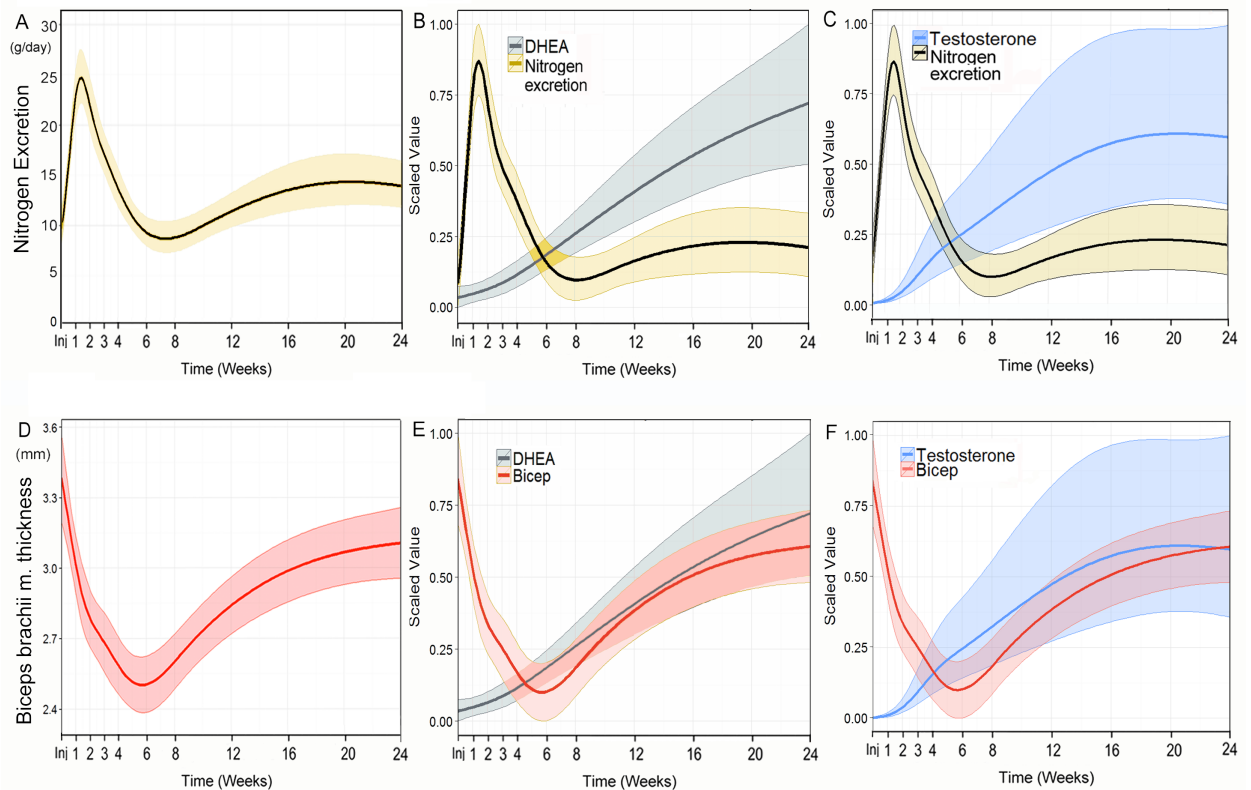

**Figure 4. The relationship between (A) Urinary Nitrogen Excretion or (B) biceps muscle thickness with (B and D) DHEA and (C and F) testosterone, over time for young (<50), severely injured (NISS>15) males who had survived and not been given anabolic steroids. Muscle thickness data was modelled using a mixed effects technique; modelling time as a 6 and 7-knot restricted cubic spline respectively provided the best fit. Data are means and 95% confidence intervals for model-based predicted fixed effects of time are shown.**

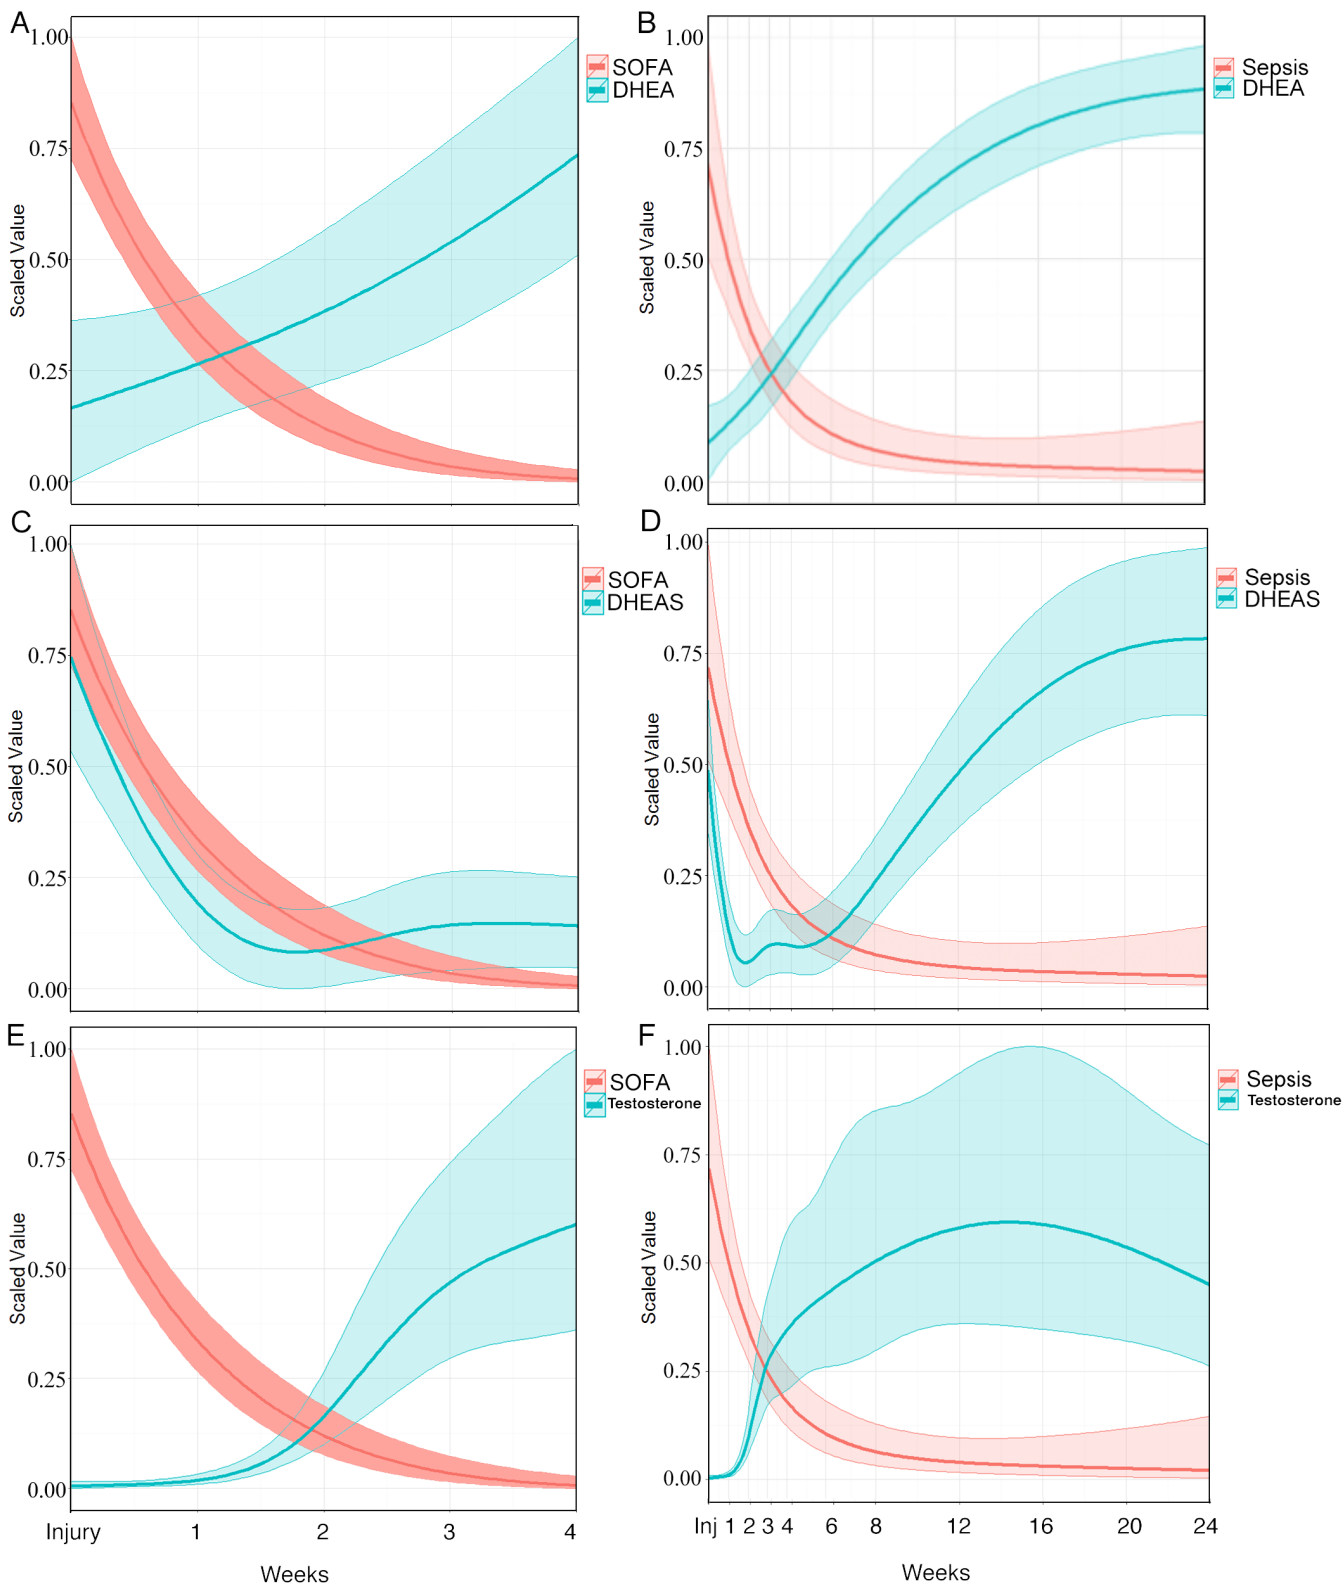

**Figure 5. Sequential Organ Failure Assessment (SOFA) score and probability of sepsis in relation to endocrine response.** SOFA and sepsis are related serum concentrations of DHEA (Panels A+B), DHEAS (Panels C+D), and testosterone (E+F). Data were modelled using a non-linear mixed effects model that accounts for unbalanced repeated measures using a 4-knot cubic spline. Modelled data are reported as means and 95% confidence intervals.
